# Supplementary material for: Cerebrospinal Fluid Metabolomics, Brain Morphometry, and Psychiatric Disorders: A Mendelian Randomization Study
Source: Research Square preprint supplement (doi:10.21203/rs.3.rs-7571315/v1), 2025-11-10
Supplement: Supplementary file 1 [file e81b0a4a0ebb0a4c48319c43.xlsx]

## Sheet: Sheet1
id	Trait
GCST90026002	Bilirubin (z,z) levels
GCST90026003	Cholesterol levels
GCST90026004	Lysine levels
GCST90026005	Tyrosine levels
GCST90026006	Pyroglutamine levels
GCST90026007	Cortisol levels
GCST90026008	Lactate levels
GCST90026009	Sulfate levels
GCST90026010	1,5-anhydroglucitol (1,5-ag) levels
GCST90026011	Kynurenine levels
GCST90026012	Asparagine levels
GCST90026013	Glycine levels
GCST90026014	Proline levels
GCST90026015	Ornithine levels
GCST90026016	Citrulline levels
GCST90026017	Acetoacetate levels
GCST90026018	Sphingomyelin (d18:1/14:0, d16:1/16:0) levels
GCST90026019	Sphingomyelin (d18:1/18:1, d18:2/18:0) levels
GCST90026020	Sphingomyelin (d18:1/20:0, d16:1/22:0) levels
GCST90026021	Sphingomyelin (d18:1/20:1, d18:2/20:0) levels
GCST90026022	Sphingomyelin (d18:1/22:1, d18:2/22:0, d16:1/24:1) levels
GCST90026023	Sphingomyelin (d18:1/24:1, d18:2/24:0) levels
GCST90026024	Sphingomyelin (d18:2/16:0, d18:1/16:1) levels
GCST90026025	Sphingomyelin (d18:2/24:1, d18:1/24:2) levels
GCST90026026	Allantoin levels
GCST90026027	Alpha-ketoglutarate levels
GCST90026028	Dimethylglycine levels
GCST90026029	Glucuronate levels
GCST90026030	Glycerol 3-phosphate levels
GCST90026031	Hypoxanthine levels
GCST90026032	3-indoxyl sulfate levels
GCST90026033	Inosine levels
GCST90026034	Malate levels
GCST90026035	Taurine levels
GCST90026036	Uridine levels
GCST90026037	Xanthine levels
GCST90026038	Phosphate levels
GCST90026039	3-hydroxyisobutyrate levels
GCST90026040	5-oxoproline levels
GCST90026041	P-cresol sulfate levels
GCST90026042	(N(1) + N(8))-acetylspermidine levels
GCST90026043	1,2-dipalmitoyl-gpc (16:0/16:0) levels
GCST90026044	1-(1-enyl-palmitoyl)-2-arachidonoyl-gpc (p-16:0/20:4) levels
GCST90026045	1-(1-enyl-palmitoyl)-2-oleoyl-gpc (p-16:0/18:1) levels
GCST90026046	1-arachidonoyl-gpc (20:4n6) levels
GCST90026047	1-linoleoyl-gpc (18:2) levels
GCST90026048	1-methylhistidine levels
GCST90026049	1-methylnicotinamide levels
GCST90026050	1-myristoyl-2-palmitoyl-gpc (14:0/16:0) levels
GCST90026051	1-oleoyl-GPC (18:1) levels
GCST90026315	X-23308 levels
GCST90026316	Ethyl beta-glucopyranoside levels
GCST90026317	X-23587 levels
GCST90026318	X-23590 levels
GCST90026319	X-23593 levels
GCST90026320	X-23639 levels
GCST90026321	X-23644 levels
GCST90026322	X-23652 levels
GCST90026323	X-23739 levels
GCST90026324	X-24228 levels
GCST90026325	X-24295 levels
GCST90026326	3-(3-amino-3-carboxypropyl)uridine levels
GCST90026327	X-24337 levels
GCST90026328	X-24431 levels
GCST90026329	X-24452 levels
GCST90026330	X-24686 levels
GCST90026331	X-24699 levels
GCST90026332	3-amino-2-piperidone levels
GCST90026333	X-24813 levels
GCST90026334	X-24952 levels
GCST90026335	X-25109 levels
GCST90026336	N6-methyllysine levels
GCST90025999	Glucose levels
GCST90026000	Creatinine levels
GCST90026001	Urate levels
GCST90026052	1-palmitoyl-2-arachidonoyl-gpc (16:0/20:4n6) levels
GCST90026053	1-palmitoyl-2-docosahexaenoyl-gpc (16:0/22:6) levels
GCST90026054	1-palmitoyl-2-linoleoyl-gpc (16:0/18:2) levels
GCST90026055	1-palmitoyl-2-oleoyl-gpc (16:0/18:1) levels
GCST90026056	1-palmitoyl-2-palmitoleoyl-gpc (16:0/16:1) levels
GCST90026057	1-palmitoyl-2-stearoyl-gpc (16:0/18:0) levels
GCST90026058	1-palmitoyl-2-stearoyl-gpc (16:0/18:0) levels
GCST90026059	1-ribosyl-imidazoleacetate levels
GCST90026060	1-stearoyl-2-arachidonoyl-gpc (18:0/20:4) levels
GCST90026061	1-stearoyl-2-docosahexaenoyl-gpc (18:0/22:6) levels
GCST90026062	1-stearoyl-2-linoleoyl-gpc (18:0/18:2) levels
GCST90026063	1-stearoyl-2-oleoyl-gpc (18:0/18:1) levels
GCST90026064	1-stearoyl-gpc (18:0) levels
GCST90026065	2'-deoxyuridine levels
GCST90026066	2'-o-methylcytidine levels
GCST90026067	2,3-dihydroxy-2-methylbutyrate levels
GCST90026068	2,3-dihydroxyisovalerate levels
GCST90026069	2-aminobutyrate levels
GCST90026070	2-aminophenol sulfate levels
GCST90026071	2-hydroxy-3-methylvalerate levels
GCST90026072	2-hydroxyadipate levels
GCST90026073	2-hydroxybutyrate/2-hydroxyisobutyrate levels
GCST90026074	2-hydroxyglutarate levels
GCST90026075	2-oxoadipate levels
GCST90026076	2-piperidinone levels
GCST90026077	3-(4-hydroxyphenyl)lactate levels
GCST90026078	3-carboxy-4-methyl-5-propyl-2-furanpropanoate (cmpf) levels
GCST90026079	3-hydroxy-2-ethylpropionate levels
GCST90026080	3-hydroxy-3-methylglutarate levels
GCST90026081	3-hydroxybutyrate (bhba) levels
GCST90026082	3-hydroxyhexanoate levels
GCST90026083	3-hydroxyoctanoate levels
GCST90026084	3-hydroxypyridine sulfate levels
GCST90026085	3-hydroxystachydrine levels
GCST90026086	3-methoxytyramine sulfate levels
GCST90026087	3-methoxytyrosine levels
GCST90026088	3-methyl-2-oxobutyrate levels
GCST90026089	3-methyl-2-oxovalerate levels
GCST90026090	3-methylglutaconate levels
GCST90026091	3-methylglutarylcarnitine (2) levels
GCST90026092	3-methylhistidine levels
GCST90026093	3-methylxanthine levels
GCST90026094	3-ureidopropionate levels
GCST90026095	4-acetamidobutanoate levels
GCST90026096	4-methyl-2-oxopentanoate levels
GCST90026097	4-methylcatechol sulfate levels
GCST90026098	5,6-dihydrothymine levels
GCST90026099	5,6-dihydrouridine levels
GCST90026100	5-acetylamino-6-amino-3-methyluracil levels
GCST90026101	5-hydroxyhexanoate levels
GCST90026102	5-hydroxyindoleacetate levels
GCST90026103	5-methylcytidine levels
GCST90026104	5-methylthioadenosine (mta) levels
GCST90026105	5-methyluridine (ribothymidine) levels
GCST90026106	6-oxopiperidine-2-carboxylate levels
GCST90026107	7-alpha-hydroxy-3-oxo-4-cholestenoate (7-hoca) levels
GCST90026108	7-methylguanine levels
GCST90026109	7-methylxanthine levels
GCST90026110	Acetylcarnitine (c2) levels
GCST90026111	Acisoga levels
GCST90026112	Adenine levels
GCST90026113	Adenosine 3',5'-cyclic monophosphate (camp) levels
GCST90026114	Alanine levels
GCST90026115	Alpha-hydroxyisocaproate levels
GCST90026116	Alpha-hydroxyisovalerate levels
GCST90026117	Alpha-ketoglutaramate levels
GCST90026118	Alpha-tocopherol levels
GCST90026119	Arabinose levels
GCST90026120	Arabitol/xylitol levels
GCST90026121	Arabonate/xylonate levels
GCST90026122	Arachidonate (20:4n6) levels
GCST90026123	Argininate levels
GCST90026124	Arginine levels
GCST90026125	Argininosuccinate levels
GCST90026126	Ascorbate (vitamin c) levels
GCST90026290	X-11795 levels
GCST90026291	X-12007 levels
GCST90026292	X-12015 levels
GCST90026293	X-12100 levels
GCST90026294	X-12101 levels
GCST90026295	X-12104 levels
GCST90026296	Ascorbic acid 3-sulfate levels
GCST90026297	X-12411 levels
GCST90026298	X-12906 levels
GCST90026299	1-carboxyethylvaline levels
GCST90026300	X-13728 levels
GCST90026301	X-14056 levels
GCST90026302	1-methyl-5-imidazoleacetate levels
GCST90026303	X-15245 levels
GCST90026304	1-carboxyethylphenylalanine levels
GCST90026305	X-15674 levels
GCST90026306	N,n,n-trimethyl-alanylproline betaine (tmap) levels
GCST90026307	X-18887 levels
GCST90026308	X-19438 levels
GCST90026309	X-21286 levels
GCST90026310	Butyrate (4:0) levels
GCST90026311	X-21733 levels
GCST90026312	2-o-methylascorbic acid levels
GCST90026313	X-22162 levels
GCST90026314	4-chlorobenzoic acid levels
GCST90026202	Methylsuccinoylcarnitine levels
GCST90026203	Myo-inositol levels
GCST90026204	N-acetyl-3-methylhistidine levels
GCST90026205	N-acetyl-aspartyl-glutamate (naag) levels
GCST90026206	N-acetyl-beta-alanine levels
GCST90026207	N-acetyl-isoputreanine levels
GCST90026208	N-acetylalanine levels
GCST90026209	N-acetylarginine levels
GCST90026210	N-acetylasparagine levels
GCST90026211	N-acetylaspartate (naa) levels
GCST90026212	N-acetylglucosamine/n-acetylgalactosamine levels
GCST90026213	N-acetylglutamate levels
GCST90026214	N-acetylglutamine levels
GCST90026215	N-acetylglycine levels
GCST90026216	N-acetylhistidine levels
GCST90026217	N-acetylisoleucine levels
GCST90026218	N-acetylleucine levels
GCST90026219	N-acetylmethionine levels
GCST90026220	N-acetylneuraminate levels
GCST90026221	N-acetylphenylalanine levels
GCST90026222	N-acetylputrescine levels
GCST90026223	N-acetylserine levels
GCST90026224	N-acetyltaurine levels
GCST90026225	N-acetylthreonine levels
GCST90026226	N-acetylvaline levels
GCST90026227	N-delta-acetylornithine levels
GCST90026228	N-formylanthranilic acid levels
GCST90026229	N-formylmethionine levels
GCST90026230	N-trimethyl 5-aminovalerate levels
GCST90026231	N1-methyl-2-pyridone-5-carboxamide levels
GCST90026232	N1-methyladenosine levels
GCST90026233	N1-methylinosine levels
GCST90026234	N2,n2-dimethylguanosine levels
GCST90026235	N6,n6,n6-trimethyllysine levels
GCST90026236	N6-carbamoylthreonyladenosine levels
GCST90026237	N6-succinyladenosine levels
GCST90026238	Nicotinamide riboside levels
GCST90026239	O-sulfo-l-tyrosine levels
GCST90026240	Octanoylcarnitine (c8) levels
GCST90026241	Orotate levels
GCST90026242	Orotidine levels
GCST90026243	Oxalate (ethanedioate) levels
GCST90026244	Palmitoyl dihydrosphingomyelin (d18:0/16:0) levels
GCST90026245	Palmitoyl sphingomyelin (d18:1/16:0) levels
GCST90026246	Pantothenate levels
GCST90026247	Phenol sulfate levels
GCST90026248	Phenylacetylglutamine levels
GCST90026249	Phenylalanine levels
GCST90026250	Phenyllactate (pla) levels
GCST90026251	Pipecolate levels
GCST90026152	Dimethylarginine (sdma + adma) levels
GCST90026153	Dimethylmalonic acid levels
GCST90026154	Dopamine 3-o-sulfate levels
GCST90026155	Ergothioneine levels
GCST90026156	Erythritol levels
GCST90026157	Erythronate levels
GCST90026158	Ethylmalonate levels
GCST90026159	Fructose levels
GCST90026160	Galactonate levels
GCST90026161	Galactosylglycerol levels
GCST90026162	Gamma-glutamyl-alpha-lysine levels
GCST90026163	Gamma-glutamylglutamine levels
GCST90026164	Gamma-glutamylleucine levels
GCST90026165	Gamma-glutamylphenylalanine levels
GCST90026166	Gamma-glutamylthreonine levels
GCST90026167	Gamma-glutamylvaline levels
GCST90026168	Gluconate levels
GCST90026169	Glutamate levels
GCST90026170	Glutamine levels
GCST90026171	Glutarylcarnitine (c5-dc) levels
GCST90026172	Glycerate levels
GCST90026173	Glycerol levels
GCST90026174	Glycerophosphoinositol levels
GCST90026175	Guaiacol sulfate levels
GCST90026176	Guanosine levels
GCST90026127	Behenoyl sphingomyelin (d18:1/22:0) levels
GCST90026128	Benzoate levels
GCST90026129	Beta-alanine levels
GCST90026130	Beta-citrylglutamate levels
GCST90026131	Beta-hydroxyisovalerate levels
GCST90026132	Betaine levels
GCST90026133	C-glycosyltryptophan levels
GCST90026134	Caffeine levels
GCST90026135	Carboxyethyl-gaba levels
GCST90026136	Carnitine levels
GCST90026137	Catechol sulfate levels
GCST90026138	Choline levels
GCST90026139	Choline phosphate levels
GCST90026140	Citramalate levels
GCST90026141	Citrate levels
GCST90026142	Cortisone levels
GCST90026143	Creatine levels
GCST90026144	Cys-gly, oxidized levels
GCST90026145	Cysteine levels
GCST90026146	Cysteinylglycine levels
GCST90026147	Cysteinylglycine disulfide levels
GCST90026148	Cytidine levels
GCST90026149	Deoxycarnitine levels
GCST90026150	Diglycerol levels
GCST90026151	Dimethyl sulfone levels
GCST90026177	Gulonate levels
GCST90026178	Hippurate levels
GCST90026179	Histidine levels
GCST90026180	Homoarginine levels
GCST90026181	Homocarnosine levels
GCST90026182	Homostachydrine levels
GCST90026183	Homovanillate (hva) levels
GCST90026184	Hydroxy-cmpf levels
GCST90026185	Hydroxyasparagine levels
GCST90026186	Indoleacetate levels
GCST90026187	Isobutyrylcarnitine (c4) levels
GCST90026188	Isocitrate levels
GCST90026189	Isoleucine levels
GCST90026190	Isovalerate (i5:0) levels
GCST90026191	Kynurenate levels
GCST90026192	Leucine levels
GCST90026193	Maleate levels
GCST90026194	Mannitol/sorbitol levels
GCST90026195	Mannose levels
GCST90026196	Methionine levels
GCST90026197	Methionine sulfone levels
GCST90026198	Methionine sulfoxide levels
GCST90026199	Methyl glucopyranoside (alpha + beta) levels
GCST90026200	Methylmalonate (mma) levels
GCST90026201	Methylsuccinate levels
GCST90026252	Propionylcarnitine (c3) levels
GCST90026253	Pseudouridine levels
GCST90026254	Pyridoxal levels
GCST90026255	Pyridoxate levels
GCST90026256	Pyruvate levels
GCST90026257	Quinate levels
GCST90026258	Ribitol levels
GCST90026259	Ribonate levels
GCST90026260	Ribulonate/xylulonate levels
GCST90026261	S-1-pyrroline-5-carboxylate levels
GCST90026262	S-methylcysteine levels
GCST90026263	Salicylate levels
GCST90026264	Serine levels
GCST90026265	Spermidine levels
GCST90026266	Stachydrine levels
GCST90026267	Stearoyl sphingomyelin (d18:1/18:0) levels
GCST90026268	Succinimide levels
GCST90026269	Succinylcarnitine (c4-dc) levels
GCST90026270	Tartarate levels
GCST90026271	Tartronate (hydroxymalonate) levels
GCST90026272	Theobromine levels
GCST90026273	Theophylline levels
GCST90026274	Thioproline levels
GCST90026275	Threonate levels
GCST90026276	Threonine levels
GCST90026277	Trans-4-hydroxyproline levels
GCST90026278	Trigonelline (n'-methylnicotinate) levels
GCST90026279	Trimethylamine n-oxide levels
GCST90026280	Tryptophan levels
GCST90026281	Tryptophan betaine levels
GCST90026282	Uracil levels
GCST90026283	Urea levels
GCST90026284	Valine levels
GCST90026285	X-10457 levels
GCST90026286	X-11261 levels
GCST90026287	2,3-dihydroxy-5-methylthio-4-pentenoate (dmtpa) levels
GCST90026288	X-11612 levels
GCST90026289	X-11787 levels
