# Supplementary material for: Cerebrospinal Fluid Metabolomics, Brain Morphometry, and Psychiatric Disorders: A Mendelian Randomization Study
Source: Research Square preprint supplement (doi:10.21203/rs.3.rs-7571315/v1), 2025-11-10
Supplement: Supplementary file 2 [file fc9f41d33ab02114285685fe.xlsx]

## Sheet: Table 1
Table 1 Association between cerebrospinal fluid metabolomics and psychiatric disorders
Exposure	Outcome	method	nsnp	pval	OR (95% CI)	Q_pval	egger_intercept_pval
Cysteine levels	BD	MR Egger	24	0.0218465	1.52 (1.09-2.12)
		Weighted median	24	0.0480674	1.16 (1.00-1.35)
		Inverse variance weighted	24	0.000122319	1.23 (1.11-1.37)	0.67228	0.204474
		Simple mode	24	0.0858179	1.31 (0.98-1.76)
		Weighted mode	24	0.114407	1.29 (0.95-1.74)
Betaine levels	MDD	MR Egger	13	0.0440091	1.55 (1.06-2.25)
		Weighted median	13	0.00505804	1.40 (1.11-1.78)
		Inverse variance weighted	13	0.000125463	1.40 (1.18-1.66)	0.65722	0.570792
		Simple mode	13	0.0147897	1.64 (1.17-2.31)
		Weighted mode	13	0.108927	1.35 (0.96-1.89)
N-acetylglutamine levels	MDD	MR Egger	18	0.112401	1.25 (0.96-1.63)
		Weighted median	18	0.00622986	1.41 (1.10-1.79)
		Inverse variance weighted	18	2.40363e-05	1.42 (1.21-1.68)	0.796471	0.235473
		Simple mode	18	0.014399	1.69 (1.16-2.47)
		Weighted mode	18	0.0397018	1.41 (1.04-1.90)

## Sheet: Table S1
Table S1. STROBE-MR checklist of recommended items to address in reports of Mendelian randomisation studies
Item No.	Section	Checklist item	Section (paragraph number)
1	TITLE and ABSTRACT	Indicate Mendelian randomisation as the study’s design in the title and/or the abstract if that is a main purpose of the study	Title page
	INTRODUCTION
2	Background	Explain the scientific background and rationale for the reported study. What is the exposure? Is a potential causal relationship between exposure and outcome plausible? Justify why MR is a helpful method to address the study question	Introduction
3	Objectives	State specific objectives clearly, including pre-specified causal hypotheses (if any). State that MR is a method that, under specific assumptions, intends to estimate causal effects	Introduction
	METHODS
4	Study design and data sources	Present key elements of the study design early in the article. Consider including a table listing sources of data for all phases of the study. For each data source contributing to the analysis, describe the following:	Methods
	a)	Setting: Describe the study design and the underlying population, if possible. Describe the setting, locations, and relevant dates, including periods of recruitment, exposure, follow-up, and data collection, when available.	Methods
	b)	Participants: Give the eligibility criteria, and the sources and methods of selection of participants. Report the sample size, and whether any power or sample size calculations were carried out prior to the main analysis	Methods
	c)	Describe measurement, quality control and selection of genetic variants	Methods
	d)	For each exposure, outcome, and other relevant variables, describe methods of assessment and diagnostic criteria for diseases	Methods
	e)	Provide details of ethics committee approval and participant informed consent, if relevant	Methods
5	Assumptions	Explicitly state the three core IV assumptions for the main analysis (relevance, independence and exclusion restriction) as well assumptions for any additional or sensitivity analysis	Methods
6	Statistical methods: main analysis	Describe statistical methods and statistics used
	a)	Describe how quantitative variables were handled in the analyses (i.e., scale, units, model)	Methods
	b)	Describe how genetic variants were handled in the analyses and, if applicable, how their weights were selected	Methods
	c)	Describe the MR estimator (e.g. two-stage least squares, Wald ratio) and related statistics. Detail the included covariates and, in case of two-sample MR, whether the same covariate set was used for adjustment in the two samples	Methods
	d)	Explain how missing data were addressed	N/A
	e)	If applicable, indicate how multiple testing was addressed	Methods
7	Assessment of assumptions	Describe any methods or prior knowledge used to assess the assumptions or justify their validity	Methods
8	Sensitivity analyses and additional analyses	Describe any sensitivity analyses or additional analyses performed (e.g. comparison of effect estimates from different approaches, independent replication, bias analytic techniques, validation of instruments, simulations)	Methods
9	Software and pre-registration
	a)	Name statistical software and package(s), including version and settings used	Methods
	b)	State whether the study protocol and details were pre-registered (as well as when and where)	N/A
	RESULTS
10	Descriptive data
	a)	Report the numbers of individuals at each stage of included studies and reasons for exclusion. Consider use of a flow-diagram	Methods
	b)	Report summary statistics for phenotypic exposure(s), outcome(s) and other relevant variables (e.g. means, SDs, proportions)	Methods
	c)	If the data sources include meta-analyses of previous studies, provide the assessments of heterogeneity across these studies	N/A
	d)	For two-sample Mendelian randomisation:	N/A
		i. Provide justification of the similarity of the genetic variant-exposure associations between the exposure and outcome samples
		ii. Provide information on the number of individuals who were in both samples for the exposure and for the outcome
11	Main results
	a)	Report the associations between genetic variant and exposure, and between genetic variant and outcome, preferably on an interpretable scale	Results
	b)	Report MR estimates of the relationship between exposure and outcome, and the measures of uncertainty from the MR analysis, on an interpretable scale, such as odds ratio or relative risk per SD difference	Results
	c)	If relevant, consider translating estimates of relative risk into absolute risk for a meaningful time period	N/A
	d)	Consider plots to visualize results (e.g. forest plot, scatterplot of associations between genetic variants and outcome versus between genetic variants and exposure)	Figures
12	Assessment of assumptions
	a)	Report the assessment of the validity of the assumptions	Results
	b)	Report any additional statistics (e.g., assessments of heterogeneity across genetic variants, such as I2, Q statistic or E-value)	Results
13	Sensitivity analyses and additional analyses
	a)	Report any sensitivity analyses to assess the robustness of the main results to violations of the assumptions	Methods
	b)	Report results from other sensitivity analyses or additional analyses
	c)	Report any assessment of direction of causal relationship (e.g., bidirectional MR)	N/A
	d)	When relevant, report and compare with estimates from non-MR analyses	N/A
	e)	Consider additional plots to visualize results (e.g., leave-one-out analyses)	Figures
	DISCUSSION
14	Key results	Summarize key results with reference to study objectives	Discussion
15	Limitations	Discuss limitations of the study, taking into account the validity of the IV assumptions, other sources of potential bias, and imprecision. Discuss both direction and magnitude of any potential bias and any efforts to address them	Discussion
16	Interpretation
	a)	Meaning: Give a cautious overall interpretation of results in the context of their limitations and in comparison with other studies	Discussion
	b)	Mechanism: Discuss underlying biological mechanisms that could drive a potential causal relationship between the investigated exposure and the outcome, and whether the gene-environment equivalence assumption is reasonable. Use causal language carefully, clarifying that IV estimates may provide causal effects only under certain assumptions	Discussion
	c)	Clinical relevance: Discuss whether the results have clinical or public policy relevance, and to what extent they inform effect sizes of possible interventions	Discussion
17	Generalizability	Discuss the generalizability of the study results (a) to other populations, (b) across other exposure periods/timings, and (c) across other levels of exposure	Discussion
	OTHER INFORMATION
18	Funding	Describe sources of funding and the role of funders in the present study and, if applicable, sources of funding for the databases and original study or studies on which the present study is based	Funding section
19	Data and data sharing	Provide the data used to perform all analyses or report where and how the data can be accessed, and reference these sources in the article. Provide the statistical code needed to reproduce the results in the article,or report whether the code is publicly accessible and if so, where	Data share statement & Tables
20	Conflicts of Interest	All authors should declare all potential conflicts of interest	Competing interests section

## Sheet: Table S2
id	Trait
GCST90026002	Bilirubin (z,z) levels
GCST90026003	Cholesterol levels
GCST90026004	Lysine levels
GCST90026005	Tyrosine levels
GCST90026006	Pyroglutamine levels
GCST90026007	Cortisol levels
GCST90026008	Lactate levels
GCST90026009	Sulfate levels
GCST90026010	1,5-anhydroglucitol (1,5-ag) levels
GCST90026011	Kynurenine levels
GCST90026012	Asparagine levels
GCST90026013	Glycine levels
GCST90026014	Proline levels
GCST90026015	Ornithine levels
GCST90026016	Citrulline levels
GCST90026017	Acetoacetate levels
GCST90026018	Sphingomyelin (d18:1/14:0, d16:1/16:0) levels
GCST90026019	Sphingomyelin (d18:1/18:1, d18:2/18:0) levels
GCST90026020	Sphingomyelin (d18:1/20:0, d16:1/22:0) levels
GCST90026021	Sphingomyelin (d18:1/20:1, d18:2/20:0) levels
GCST90026022	Sphingomyelin (d18:1/22:1, d18:2/22:0, d16:1/24:1) levels
GCST90026023	Sphingomyelin (d18:1/24:1, d18:2/24:0) levels
GCST90026024	Sphingomyelin (d18:2/16:0, d18:1/16:1) levels
GCST90026025	Sphingomyelin (d18:2/24:1, d18:1/24:2) levels
GCST90026026	Allantoin levels
GCST90026027	Alpha-ketoglutarate levels
GCST90026028	Dimethylglycine levels
GCST90026029	Glucuronate levels
GCST90026030	Glycerol 3-phosphate levels
GCST90026031	Hypoxanthine levels
GCST90026032	3-indoxyl sulfate levels
GCST90026033	Inosine levels
GCST90026034	Malate levels
GCST90026035	Taurine levels
GCST90026036	Uridine levels
GCST90026037	Xanthine levels
GCST90026038	Phosphate levels
GCST90026039	3-hydroxyisobutyrate levels
GCST90026040	5-oxoproline levels
GCST90026041	P-cresol sulfate levels
GCST90026042	(N(1) + N(8))-acetylspermidine levels
GCST90026043	1,2-dipalmitoyl-gpc (16:0/16:0) levels
GCST90026044	1-(1-enyl-palmitoyl)-2-arachidonoyl-gpc (p-16:0/20:4) levels
GCST90026045	1-(1-enyl-palmitoyl)-2-oleoyl-gpc (p-16:0/18:1) levels
GCST90026046	1-arachidonoyl-gpc (20:4n6) levels
GCST90026047	1-linoleoyl-gpc (18:2) levels
GCST90026048	1-methylhistidine levels
GCST90026049	1-methylnicotinamide levels
GCST90026050	1-myristoyl-2-palmitoyl-gpc (14:0/16:0) levels
GCST90026051	1-oleoyl-GPC (18:1) levels
GCST90026315	X-23308 levels
GCST90026316	Ethyl beta-glucopyranoside levels
GCST90026317	X-23587 levels
GCST90026318	X-23590 levels
GCST90026319	X-23593 levels
GCST90026320	X-23639 levels
GCST90026321	X-23644 levels
GCST90026322	X-23652 levels
GCST90026323	X-23739 levels
GCST90026324	X-24228 levels
GCST90026325	X-24295 levels
GCST90026326	3-(3-amino-3-carboxypropyl)uridine levels
GCST90026327	X-24337 levels
GCST90026328	X-24431 levels
GCST90026329	X-24452 levels
GCST90026330	X-24686 levels
GCST90026331	X-24699 levels
GCST90026332	3-amino-2-piperidone levels
GCST90026333	X-24813 levels
GCST90026334	X-24952 levels
GCST90026335	X-25109 levels
GCST90026336	N6-methyllysine levels
GCST90025999	Glucose levels
GCST90026000	Creatinine levels
GCST90026001	Urate levels
GCST90026052	1-palmitoyl-2-arachidonoyl-gpc (16:0/20:4n6) levels
GCST90026053	1-palmitoyl-2-docosahexaenoyl-gpc (16:0/22:6) levels
GCST90026054	1-palmitoyl-2-linoleoyl-gpc (16:0/18:2) levels
GCST90026055	1-palmitoyl-2-oleoyl-gpc (16:0/18:1) levels
GCST90026056	1-palmitoyl-2-palmitoleoyl-gpc (16:0/16:1) levels
GCST90026057	1-palmitoyl-2-stearoyl-gpc (16:0/18:0) levels
GCST90026058	1-palmitoyl-2-stearoyl-gpc (16:0/18:0) levels
GCST90026059	1-ribosyl-imidazoleacetate levels
GCST90026060	1-stearoyl-2-arachidonoyl-gpc (18:0/20:4) levels
GCST90026061	1-stearoyl-2-docosahexaenoyl-gpc (18:0/22:6) levels
GCST90026062	1-stearoyl-2-linoleoyl-gpc (18:0/18:2) levels
GCST90026063	1-stearoyl-2-oleoyl-gpc (18:0/18:1) levels
GCST90026064	1-stearoyl-gpc (18:0) levels
GCST90026065	2'-deoxyuridine levels
GCST90026066	2'-o-methylcytidine levels
GCST90026067	2,3-dihydroxy-2-methylbutyrate levels
GCST90026068	2,3-dihydroxyisovalerate levels
GCST90026069	2-aminobutyrate levels
GCST90026070	2-aminophenol sulfate levels
GCST90026071	2-hydroxy-3-methylvalerate levels
GCST90026072	2-hydroxyadipate levels
GCST90026073	2-hydroxybutyrate/2-hydroxyisobutyrate levels
GCST90026074	2-hydroxyglutarate levels
GCST90026075	2-oxoadipate levels
GCST90026076	2-piperidinone levels
GCST90026077	3-(4-hydroxyphenyl)lactate levels
GCST90026078	3-carboxy-4-methyl-5-propyl-2-furanpropanoate (cmpf) levels
GCST90026079	3-hydroxy-2-ethylpropionate levels
GCST90026080	3-hydroxy-3-methylglutarate levels
GCST90026081	3-hydroxybutyrate (bhba) levels
GCST90026082	3-hydroxyhexanoate levels
GCST90026083	3-hydroxyoctanoate levels
GCST90026084	3-hydroxypyridine sulfate levels
GCST90026085	3-hydroxystachydrine levels
GCST90026086	3-methoxytyramine sulfate levels
GCST90026087	3-methoxytyrosine levels
GCST90026088	3-methyl-2-oxobutyrate levels
GCST90026089	3-methyl-2-oxovalerate levels
GCST90026090	3-methylglutaconate levels
GCST90026091	3-methylglutarylcarnitine (2) levels
GCST90026092	3-methylhistidine levels
GCST90026093	3-methylxanthine levels
GCST90026094	3-ureidopropionate levels
GCST90026095	4-acetamidobutanoate levels
GCST90026096	4-methyl-2-oxopentanoate levels
GCST90026097	4-methylcatechol sulfate levels
GCST90026098	5,6-dihydrothymine levels
GCST90026099	5,6-dihydrouridine levels
GCST90026100	5-acetylamino-6-amino-3-methyluracil levels
GCST90026101	5-hydroxyhexanoate levels
GCST90026102	5-hydroxyindoleacetate levels
GCST90026103	5-methylcytidine levels
GCST90026104	5-methylthioadenosine (mta) levels
GCST90026105	5-methyluridine (ribothymidine) levels
GCST90026106	6-oxopiperidine-2-carboxylate levels
GCST90026107	7-alpha-hydroxy-3-oxo-4-cholestenoate (7-hoca) levels
GCST90026108	7-methylguanine levels
GCST90026109	7-methylxanthine levels
GCST90026110	Acetylcarnitine (c2) levels
GCST90026111	Acisoga levels
GCST90026112	Adenine levels
GCST90026113	Adenosine 3',5'-cyclic monophosphate (camp) levels
GCST90026114	Alanine levels
GCST90026115	Alpha-hydroxyisocaproate levels
GCST90026116	Alpha-hydroxyisovalerate levels
GCST90026117	Alpha-ketoglutaramate levels
GCST90026118	Alpha-tocopherol levels
GCST90026119	Arabinose levels
GCST90026120	Arabitol/xylitol levels
GCST90026121	Arabonate/xylonate levels
GCST90026122	Arachidonate (20:4n6) levels
GCST90026123	Argininate levels
GCST90026124	Arginine levels
GCST90026125	Argininosuccinate levels
GCST90026126	Ascorbate (vitamin c) levels
GCST90026290	X-11795 levels
GCST90026291	X-12007 levels
GCST90026292	X-12015 levels
GCST90026293	X-12100 levels
GCST90026294	X-12101 levels
GCST90026295	X-12104 levels
GCST90026296	Ascorbic acid 3-sulfate levels
GCST90026297	X-12411 levels
GCST90026298	X-12906 levels
GCST90026299	1-carboxyethylvaline levels
GCST90026300	X-13728 levels
GCST90026301	X-14056 levels
GCST90026302	1-methyl-5-imidazoleacetate levels
GCST90026303	X-15245 levels
GCST90026304	1-carboxyethylphenylalanine levels
GCST90026305	X-15674 levels
GCST90026306	N,n,n-trimethyl-alanylproline betaine (tmap) levels
GCST90026307	X-18887 levels
GCST90026308	X-19438 levels
GCST90026309	X-21286 levels
GCST90026310	Butyrate (4:0) levels
GCST90026311	X-21733 levels
GCST90026312	2-o-methylascorbic acid levels
GCST90026313	X-22162 levels
GCST90026314	4-chlorobenzoic acid levels
GCST90026202	Methylsuccinoylcarnitine levels
GCST90026203	Myo-inositol levels
GCST90026204	N-acetyl-3-methylhistidine levels
GCST90026205	N-acetyl-aspartyl-glutamate (naag) levels
GCST90026206	N-acetyl-beta-alanine levels
GCST90026207	N-acetyl-isoputreanine levels
GCST90026208	N-acetylalanine levels
GCST90026209	N-acetylarginine levels
GCST90026210	N-acetylasparagine levels
GCST90026211	N-acetylaspartate (naa) levels
GCST90026212	N-acetylglucosamine/n-acetylgalactosamine levels
GCST90026213	N-acetylglutamate levels
GCST90026214	N-acetylglutamine levels
GCST90026215	N-acetylglycine levels
GCST90026216	N-acetylhistidine levels
GCST90026217	N-acetylisoleucine levels
GCST90026218	N-acetylleucine levels
GCST90026219	N-acetylmethionine levels
GCST90026220	N-acetylneuraminate levels
GCST90026221	N-acetylphenylalanine levels
GCST90026222	N-acetylputrescine levels
GCST90026223	N-acetylserine levels
GCST90026224	N-acetyltaurine levels
GCST90026225	N-acetylthreonine levels
GCST90026226	N-acetylvaline levels
GCST90026227	N-delta-acetylornithine levels
GCST90026228	N-formylanthranilic acid levels
GCST90026229	N-formylmethionine levels
GCST90026230	N-trimethyl 5-aminovalerate levels
GCST90026231	N1-methyl-2-pyridone-5-carboxamide levels
GCST90026232	N1-methyladenosine levels
GCST90026233	N1-methylinosine levels
GCST90026234	N2,n2-dimethylguanosine levels
GCST90026235	N6,n6,n6-trimethyllysine levels
GCST90026236	N6-carbamoylthreonyladenosine levels
GCST90026237	N6-succinyladenosine levels
GCST90026238	Nicotinamide riboside levels
GCST90026239	O-sulfo-l-tyrosine levels
GCST90026240	Octanoylcarnitine (c8) levels
GCST90026241	Orotate levels
GCST90026242	Orotidine levels
GCST90026243	Oxalate (ethanedioate) levels
GCST90026244	Palmitoyl dihydrosphingomyelin (d18:0/16:0) levels
GCST90026245	Palmitoyl sphingomyelin (d18:1/16:0) levels
GCST90026246	Pantothenate levels
GCST90026247	Phenol sulfate levels
GCST90026248	Phenylacetylglutamine levels
GCST90026249	Phenylalanine levels
GCST90026250	Phenyllactate (pla) levels
GCST90026251	Pipecolate levels
GCST90026152	Dimethylarginine (sdma + adma) levels
GCST90026153	Dimethylmalonic acid levels
GCST90026154	Dopamine 3-o-sulfate levels
GCST90026155	Ergothioneine levels
GCST90026156	Erythritol levels
GCST90026157	Erythronate levels
GCST90026158	Ethylmalonate levels
GCST90026159	Fructose levels
GCST90026160	Galactonate levels
GCST90026161	Galactosylglycerol levels
GCST90026162	Gamma-glutamyl-alpha-lysine levels
GCST90026163	Gamma-glutamylglutamine levels
GCST90026164	Gamma-glutamylleucine levels
GCST90026165	Gamma-glutamylphenylalanine levels
GCST90026166	Gamma-glutamylthreonine levels
GCST90026167	Gamma-glutamylvaline levels
GCST90026168	Gluconate levels
GCST90026169	Glutamate levels
GCST90026170	Glutamine levels
GCST90026171	Glutarylcarnitine (c5-dc) levels
GCST90026172	Glycerate levels
GCST90026173	Glycerol levels
GCST90026174	Glycerophosphoinositol levels
GCST90026175	Guaiacol sulfate levels
GCST90026176	Guanosine levels
GCST90026127	Behenoyl sphingomyelin (d18:1/22:0) levels
GCST90026128	Benzoate levels
GCST90026129	Beta-alanine levels
GCST90026130	Beta-citrylglutamate levels
GCST90026131	Beta-hydroxyisovalerate levels
GCST90026132	Betaine levels
GCST90026133	C-glycosyltryptophan levels
GCST90026134	Caffeine levels
GCST90026135	Carboxyethyl-gaba levels
GCST90026136	Carnitine levels
GCST90026137	Catechol sulfate levels
GCST90026138	Choline levels
GCST90026139	Choline phosphate levels
GCST90026140	Citramalate levels
GCST90026141	Citrate levels
GCST90026142	Cortisone levels
GCST90026143	Creatine levels
GCST90026144	Cys-gly, oxidized levels
GCST90026145	Cysteine levels
GCST90026146	Cysteinylglycine levels
GCST90026147	Cysteinylglycine disulfide levels
GCST90026148	Cytidine levels
GCST90026149	Deoxycarnitine levels
GCST90026150	Diglycerol levels
GCST90026151	Dimethyl sulfone levels
GCST90026177	Gulonate levels
GCST90026178	Hippurate levels
GCST90026179	Histidine levels
GCST90026180	Homoarginine levels
GCST90026181	Homocarnosine levels
GCST90026182	Homostachydrine levels
GCST90026183	Homovanillate (hva) levels
GCST90026184	Hydroxy-cmpf levels
GCST90026185	Hydroxyasparagine levels
GCST90026186	Indoleacetate levels
GCST90026187	Isobutyrylcarnitine (c4) levels
GCST90026188	Isocitrate levels
GCST90026189	Isoleucine levels
GCST90026190	Isovalerate (i5:0) levels
GCST90026191	Kynurenate levels
GCST90026192	Leucine levels
GCST90026193	Maleate levels
GCST90026194	Mannitol/sorbitol levels
GCST90026195	Mannose levels
GCST90026196	Methionine levels
GCST90026197	Methionine sulfone levels
GCST90026198	Methionine sulfoxide levels
GCST90026199	Methyl glucopyranoside (alpha + beta) levels
GCST90026200	Methylmalonate (mma) levels
GCST90026201	Methylsuccinate levels
GCST90026252	Propionylcarnitine (c3) levels
GCST90026253	Pseudouridine levels
GCST90026254	Pyridoxal levels
GCST90026255	Pyridoxate levels
GCST90026256	Pyruvate levels
GCST90026257	Quinate levels
GCST90026258	Ribitol levels
GCST90026259	Ribonate levels
GCST90026260	Ribulonate/xylulonate levels
GCST90026261	S-1-pyrroline-5-carboxylate levels
GCST90026262	S-methylcysteine levels
GCST90026263	Salicylate levels
GCST90026264	Serine levels
GCST90026265	Spermidine levels
GCST90026266	Stachydrine levels
GCST90026267	Stearoyl sphingomyelin (d18:1/18:0) levels
GCST90026268	Succinimide levels
GCST90026269	Succinylcarnitine (c4-dc) levels
GCST90026270	Tartarate levels
GCST90026271	Tartronate (hydroxymalonate) levels
GCST90026272	Theobromine levels
GCST90026273	Theophylline levels
GCST90026274	Thioproline levels
GCST90026275	Threonate levels
GCST90026276	Threonine levels
GCST90026277	Trans-4-hydroxyproline levels
GCST90026278	Trigonelline (n'-methylnicotinate) levels
GCST90026279	Trimethylamine n-oxide levels
GCST90026280	Tryptophan levels
GCST90026281	Tryptophan betaine levels
GCST90026282	Uracil levels
GCST90026283	Urea levels
GCST90026284	Valine levels
GCST90026285	X-10457 levels
GCST90026286	X-11261 levels
GCST90026287	2,3-dihydroxy-5-methylthio-4-pentenoate (dmtpa) levels
GCST90026288	X-11612 levels
GCST90026289	X-11787 levels

## Sheet: Table S3
id	Trait
GCST90085843	Left parahippocampal volume (UKB data field 26803)
GCST90085820	Left accumbens area volume (UKB data field 26564)
GCST90085845	Left pars orbitalis volume (UKB data field 26806)
GCST90085822	Left banks of superior temporal sulcus volume (UKB data field 26789)
GCST90085847	Left pericalcarine volume (UKB data field 26808)
GCST90085848	Left postcentral volume (UKB data field 26809)
GCST90085849	Left posterior cingulate volume (UKB data field 26810)
GCST90085850	Left precentral volume (UKB data field 26811)
GCST90085851	Left precuneus volume (UKB data field 26812)
GCST90085852	Left putamen volume (UKB data field 26560)
GCST90085853	Left rostral anterior cingulate volume (UKB data field 26813)
GCST90085854	Left rostral middle frontal volume (UKB data field 26814)
GCST90085855	Left superior frontal volume (UKB data field 26815)
GCST90085856	Left superior parietal volume (UKB data field 26816)
GCST90085857	Left superior temporal volume (UKB data field 26817)
GCST90085858	Left supramarginal volume (UKB data field 26818)
GCST90085859	Left thalamus proper volume (UKB data field 26558)
GCST90085860	Left transverse temporal volume (UKB data field 26820)
GCST90085836	Left lateral occipital volume (UKB data field 26798)
GCST90085862	Right amygdala volume (UKB data field 26594)
GCST90085838	Left lingual volume (UKB data field 26800)
GCST90085864	Right caudal anterior cingulate volume (UKB data field 26891)
GCST90085840	Left middle temporal volume (UKB data field 26802)
GCST90085866	Right caudate volume (UKB data field 26590)
GCST90085842	Left paracentral volume (UKB data field 26804)
GCST90085819	Brain stem volume (UKB data field 26526)
GCST90085844	Left pars opercularis volume (UKB data field 26805)
GCST90085821	Left amygdala volume (UKB data field 26563)
GCST90085846	Left pars triangularis volume (UKB data field 26807)
GCST90085823	Left caudal anterior cingulate volume (UKB data field 26790)
GCST90085824	Left caudal middle frontal volume (UKB data field 26791)
GCST90085825	Left caudate volume (UKB data field 26559)
GCST90085867	Right cuneus volume (UKB data field 26893)
GCST90085826	Left cuneus volume (UKB data field 26792)
GCST90085827	Left ventral diencephalon (DC) volume (UKB data field 26565)
GCST90085828	Left entorhinal volume (UKB data field 26793)
GCST90085829	Left frontal pole volume (UKB data field 26819)
GCST90085830	Left fusiform volume (UKB data field 26794)
GCST90085831	Left hippocampus volume (UKB data field 26562)
GCST90085832	Left inferior parietal volume (UKB data field 26795)
GCST90085833	Left inferior temporal volume (UKB data field 26796)
GCST90085834	Left insula volume (UKB data field 26821)
GCST90085835	Left isthmus cingulate volume (UKB data field 26797)
GCST90085861	Right accumbens area volume (UKB data field 26595)
GCST90085837	Left lateral orbitofrontal volume (UKB data field 26799)
GCST90085863	Right banks of superior temporal sulcus volume (UKB data field 26890)
GCST90085839	Left medial orbitofrontal volume (UKB data field 26801)
GCST90085865	Right caudal middle frontal volume (UKB data field 26892)
GCST90085841	Left pallidum volume (UKB data field 26561)
GCST90085868	Right ventral diencephalon (DC) volume (UKB data field 26596)
GCST90085869	Right entorhinal volume (UKB data field 26894)
GCST90085870	Right frontal pole volume (UKB data field 26920)
GCST90085871	Right fusiform volume (UKB data field 26895)
GCST90085872	Right hippocampus volume (UKB data field 26593)
GCST90085873	Right inferior parietal volume (UKB data field 26896)
GCST90085874	Right inferior temporal volume (UKB data field 26897)
GCST90085875	Right insula volume (UKB data field 26922)
GCST90085876	Right isthmus cingulate volume (UKB data field 26898)
GCST90085877	Right lateral occipital volume (UKB data field 26899)
GCST90085878	Right lateral orbitofrontal volume (UKB data field 26900)
GCST90085879	Right lingual volume (UKB data field 26901)
GCST90085880	Right medial orbitofrontal volume (UKB data field 26902)
GCST90085881	Right middle temporal volume (UKB data field 26903)
GCST90085882	Right pallidum volume (UKB data field 26592)
GCST90085883	Right paracentral volume (UKB data field 26905)
GCST90085884	Right parahippocampal volume (UKB data field 26904)
GCST90085885	Right pars opercularis volume (UKB data field 26906)
GCST90085886	Right pars orbitalis volume (UKB data field 26907)
GCST90085887	Right pars triangularis volume (UKB data field 26908)
GCST90085888	Right pericalcarine volume (UKB data field 26909)
GCST90085889	Right postcentral volume (UKB data field 26910)
GCST90085890	Right posterior cingulate volume (UKB data field 26911)
GCST90085891	Right precentral volume (UKB data field 26912)
GCST90085892	Right precuneus volume (UKB data field 26913)
GCST90085893	Right putamen volume (UKB data field 26591)
GCST90085894	Right rostral anterior cingulate volume (UKB data field 26914)
GCST90085895	Right rostral middle frontal volume (UKB data field 26915)
GCST90085896	Right superior frontal volume (UKB data field 26916)
GCST90085897	Right superior parietal volume (UKB data field 26917)
GCST90085898	Right superior temporal volume (UKB data field 26918)
GCST90085899	Right supramarginal volume (UKB data field 26919)
GCST90085900	Right thalamus proper volume (UKB data field 26589)
GCST90085901	Right transverse temporal volume (UKB data field 26921)

## Sheet: Table S4
Table S4 Association between cerebrospinal fluid metabolomics and psychiatric disorders
Exposure	Outcome	method	nsnp	pval	beta	se	beta_lo_ci	beta_up_ci	or	or_lci95	or_uci95	Q_pval	egger_intercept_pval
BD	GCST90026145	MR Egger	220	0.446805	0.0339751	0.044579	-0.0533998	0.12135	1.03456	0.948001	1.12902
	Cysteine levels	Weighted median	220	0.623277	-0.00807421	0.0164373	-0.0402914	0.024143	0.991958	0.96051	1.02444
		Inverse variance weighted	220	0.456312	-0.00829591	0.0111364	-0.0301233	0.0135315	0.991738	0.970326	1.01362	0.430512	0.328527
		Simple mode	220	0.716122	-0.0202562	0.0556311	-0.129293	0.0887808	0.979948	0.878716	1.09284
		Weighted mode	220	0.955097	0.0027737	0.0492037	-0.0936656	0.099213	1.00278	0.910587	1.1043
MDD	GCST90026132	MR Egger	34	0.908593	0.00549793	0.0475083	-0.0876184	0.0986142	1.00551	0.91611	1.10364
	Betaine levels	Weighted median	34	0.541587	0.0182768	0.0299417	-0.0404088	0.0769625	1.01844	0.960397	1.08
		Inverse variance weighted	34	0.238414	0.025316	0.0214731	-0.0167714	0.0674033	1.02564	0.983368	1.06973	0.692436	0.643209
		Simple mode	34	0.786148	0.0162028	0.0592349	-0.0998977	0.132303	1.01633	0.90493	1.14145
		Weighted mode	34	0.66077	0.0229578	0.0518422	-0.0786528	0.124568	1.02322	0.924361	1.13266
MDD	GCST90026214	MR Egger	34	0.0432747	0.0916298	0.043539	0.00629343	0.176966	1.09596	1.00631	1.19359
	N-acetylglutamine levels	Weighted median	34	0.753049	0.00901784	0.0286625	-0.0471606	0.0651963	1.00906	0.953934	1.06737
		Inverse variance weighted	34	0.803849	0.0048408	0.0194904	-0.0333604	0.043042	1.00485	0.96719	1.04398	0.706056	0.0329467
		Simple mode	34	0.848561	0.0104829	0.0544679	-0.0962741	0.11724	1.01054	0.908215	1.12439
		Weighted mode	34	0.79124	0.0118674	0.0444712	-0.0752962	0.099031	1.01194	0.927469	1.1041
GCST90026132	MDD (replication)	MR Egger	25	0.735612	-0.00639983	0.0187245	-0.0430998	0.0303001	0.993621	0.957816	1.03076
Betaine levels	ukb-d-20126_4	Weighted median	25	0.0102614	0.0281637	0.0109719	0.00665879	0.0496687	1.02856	1.00668	1.05092
		Inverse variance weighted	25	0.0463429	0.0158927	0.00797722	0.000257321	0.031528	1.01602	1.00026	1.03203	0.263941	0.202557
		Simple mode	25	0.0601534	0.0458941	0.0232644	0.000295966	0.0914923	1.04696	1.0003	1.09581
		Weighted mode	25	0.0994287	0.0390114	0.0227613	-0.00560068	0.0836235	1.03978	0.994415	1.08722
GCST90026214	MDD (replication)	MR Egger	31	0.928294	0.00113945	0.0125523	-0.023463	0.0257419	1.00114	0.97681	1.02608
N-acetylglutamine levels	ukb-d-20126_4	Weighted median	31	0.992497	9.58864e-05	0.0101961	-0.0198885	0.0200803	1.0001	0.980308	1.02028
		Inverse variance weighted	31	0.984756	-0.000146322	0.00765819	-0.0151564	0.0148637	0.999854	0.984958	1.01497	0.171516	0.896993
		Simple mode	31	0.787711	0.00531045	0.019545	-0.0329978	0.0436187	1.00532	0.967541	1.04458
		Weighted mode	31	0.825831	0.00409663	0.0184546	-0.0320744	0.0402677	1.00411	0.968434	1.04109

## Sheet: Table S5
Table S5 Association between human brain morphometry and BD
Exposure	Outcome	method	nsnp	pval	or	or_lci95	or_uci95	Q_pval	egger_intercept_pval
GCST90085829	BD	MR Egger	25	0.884545	0.99973	0.99613	1.00334
Left frontal pole volume		Weighted median	25	0.0567709	1.00114	0.999967	1.00232
		Inverse variance weighted	25	0.0425345	1.00107	1.00004	1.00211	0.0277741	0.454059
		Simple mode	25	0.231037	1.00134	0.999206	1.00347
		Weighted mode	25	0.196529	1.00134	0.999365	1.00331
GCST90085837	BD	MR Egger	79	0.126463	1.00025	0.999932	1.00058
Left lateral orbitofrontal volume		Weighted median	79	0.0105553	1.00015	1.00004	1.00027
		Inverse variance weighted	79	0.00502344	1.00014	1.00004	1.00024	1.8507e-06	0.470667
		Simple mode	79	0.284547	1.00017	0.99986	1.00048
		Weighted mode	79	0.169954	1.00017	0.999929	1.00041
GCST90085850	BD	MR Egger	62	0.200555	1.00007	0.999962	1.00019
Left precentral volume		Weighted median	62	0.469791	1.00003	0.999951	1.00011
		Inverse variance weighted	62	0.0400859	1.00005	1	1.00011	0.000843501	0.690755
		Simple mode	62	0.863435	0.999986	0.999827	1.00015
		Weighted mode	62	0.649973	1.00002	0.999935	1.0001
GCST90085852	BD	MR Egger	92	0.915826	1.00003	0.999488	1.00057
Left putamen volume		Weighted median	92	0.301243	1.0001	0.999913	1.00028
		Inverse variance weighted	92	0.024004	1.00019	1.00003	1.00036	4.40813e-09	0.542121
		Simple mode	92	0.713082	0.999902	0.999378	1.00042
		Weighted mode	92	0.896431	0.999971	0.999531	1.00041
GCST90085855	BD	MR Egger	64	0.167133	1.00007	0.999971	1.00017
Left superior frontal volume		Weighted median	64	8.60809e-06	1.00009	1.00005	1.00013
		Inverse variance weighted	64	2.0114e-05	1.00007	1.00004	1.0001	0.000560468	0.970636
		Simple mode	64	0.122923	1.00008	0.999979	1.00019
		Weighted mode	64	0.0203914	1.0001	1.00002	1.00018
GCST90085863	BD	MR Egger	35	0.881067	0.999904	0.99866	1.00115
Right banks of superior temporal sulcus volume		Weighted median	35	0.347346	1.00018	0.999799	1.00057
		Inverse variance weighted	35	0.0461142	1.00047	1.00001	1.00094	5.26077e-09	0.340174
		Simple mode	35	0.181355	1.00057	0.99975	1.0014
		Weighted mode	35	0.182217	1.00056	0.999756	1.00136
GCST90085874	BD	MR Egger	58	0.268836	1.00013	0.999902	1.00036
Right inferior temporal volume		Weighted median	58	0.0464068	1.00008	1	1.00016
		Inverse variance weighted	58	0.00669447	1.0001	1.00003	1.00017	1.22656e-05	0.768014
		Simple mode	58	0.313542	1.0001	0.99991	1.00028
		Weighted mode	58	0.332904	1.00009	0.999906	1.00028
GCST90085878	BD	MR Egger	69	0.269243	1.00022	0.999833	1.00061
Right lateral orbitofrontal volume		Weighted median	69	0.210038	1.00009	0.99995	1.00023
		Inverse variance weighted	69	0.0453278	1.00013	1	1.00025	4.58388e-12	0.62588
		Simple mode	69	0.422375	1.00012	0.999825	1.00042
		Weighted mode	69	0.499003	1.00008	0.999856	1.0003
GCST90085896	BD	MR Egger	81	0.334875	1.00006	0.99994	1.00018
Right superior frontal volume		Weighted median	81	1.33633e-05	1.00009	1.00005	1.00013
		Inverse variance weighted	81	4.41326e-05	1.00008	1.00004	1.00011	1.23564e-13	0.737796
		Simple mode	81	0.441661	1.00004	0.999933	1.00016
		Weighted mode	81	0.0185814	1.0001	1.00002	1.00018

## Sheet: Table S6
Table S6 Association between cysteine levels and brain morphometry
Exposure	Outcome	method	nsnp	b	se	pval	lo_ci	up_ci	Q_pval	egger_intercept_pval
GCST90026145	GCST90085874	MR Egger	25	-456.879	181.862	0.0194612	-813.328	-100.43
Cysteine levels	Right inferior temporal volume	Weighted median	25	-190.502	81.4811	0.0193876	-350.205	-30.7993
		Inverse variance weighted	25	-131.928	61.3513	0.0315263	-252.176	-11.6792	0.252084	0.0719245
		Simple mode	25	-203.194	160.318	0.217158	-517.417	111.03
		Weighted mode	25	-199.713	154.155	0.207459	-501.857	102.431
GCST90026145	GCST90085850	MR Egger	25	-255.619	244.234	0.306152	-734.319	223.08
Cysteine levels	Left precentral volume	Weighted median	25	-49.5353	90.3144	0.583365	-226.551	127.481
		Inverse variance weighted	25	-156.284	76.9867	0.0423558	-307.178	-5.38964	0.028386	0.671624
		Simple mode	25	32.9839	210.122	0.876578	-378.855	444.823
		Weighted mode	25	28.1466	198.719	0.888546	-361.342	417.635
